# Supplementary material
Source: PubMed Central journal article supplement (PMC1480455)

a

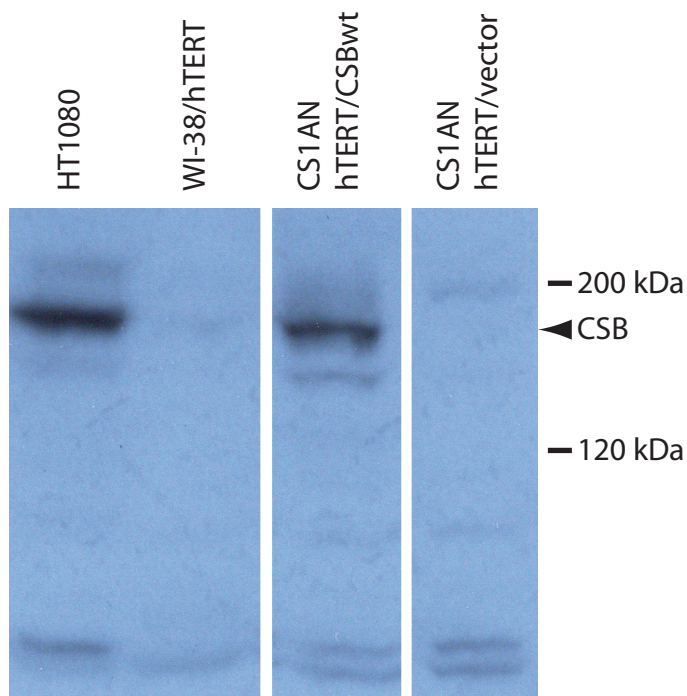

b

Fragility at RNU2 locus (per spread):  
CS1AN/SV: 85% fragile  
CS1AN/hTERT: 72% fragile  
CS1AN/hTERT/CSBwt: 35% fragile

c

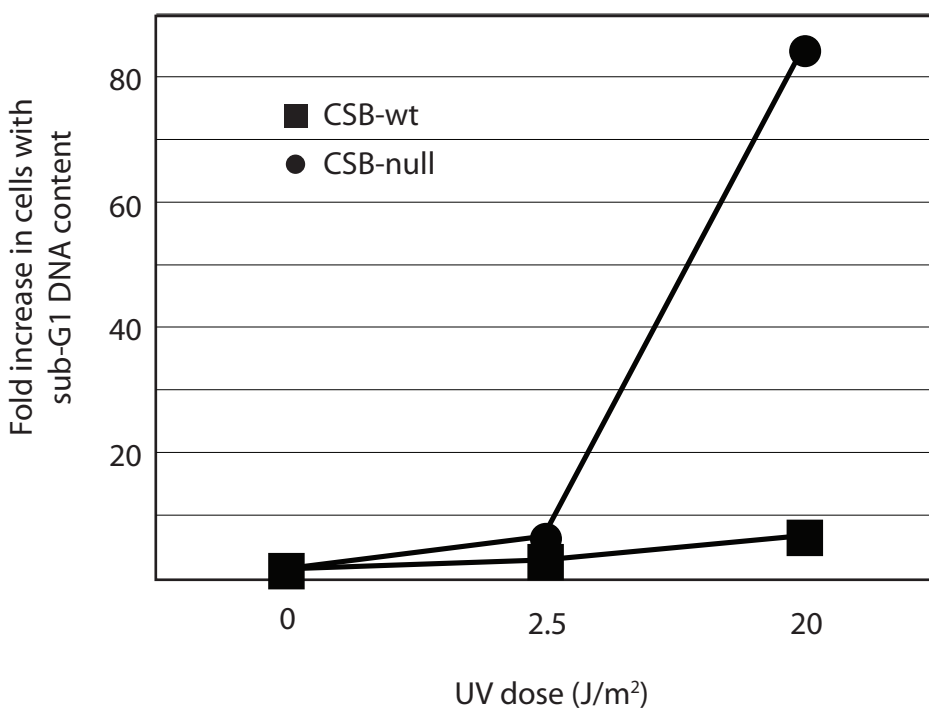

Supplement: pnas_0510909103_1.pdf [file pnas_0510909103_1.pdf]
