# Supplementary material
Source: PubMed Central journal article supplement (PMC1480455)
Supplement: pnas_0510909103_3.pdf [file pnas_0510909103_3.pdf]

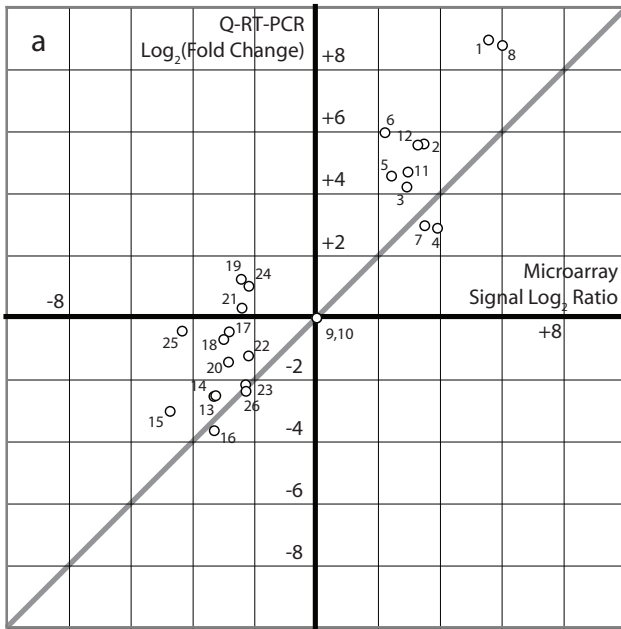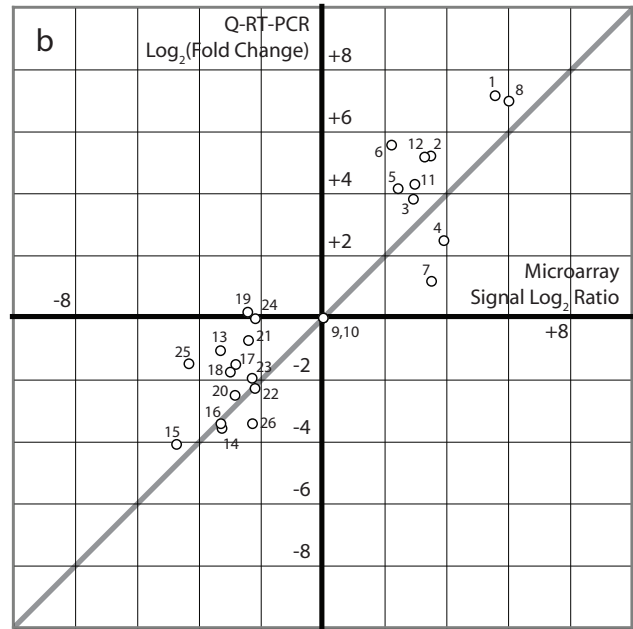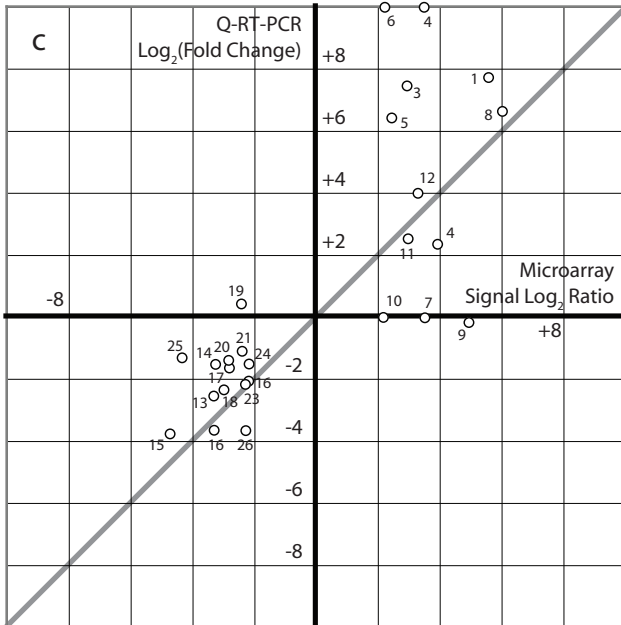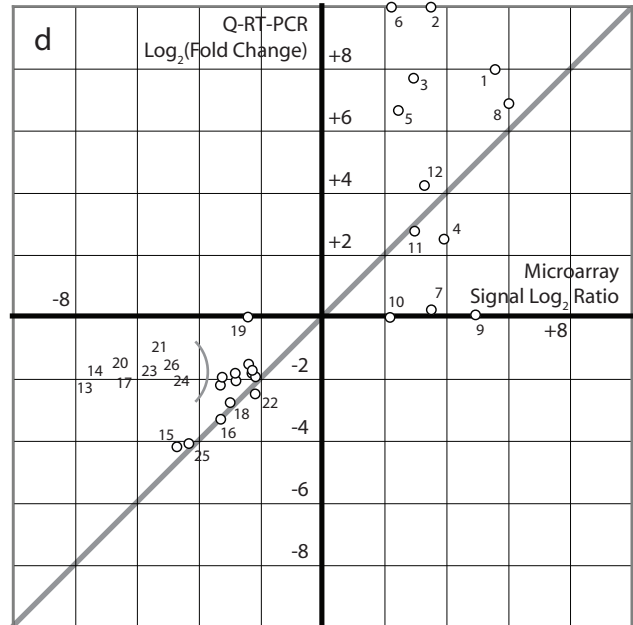

KEY:

Up-regulated by CSB  
on microarrays

Down-regulated by CSB  
on microarrays

- |         |            |
|---------|------------|
| 1 ABCB1 | 7 IL8      |
| 2 CART1 | 8 KYNU     |
| 3 CD24  | 9 MST4     |
| 4 CRIP1 | 10 PMAIP1  |
| 5 CSTA  | 11 SLC7A11 |
| 6 IFIT2 | 12 SRI     |

- |            |           |
|------------|-----------|
| 13 CDKN1A  | 20 LBH    |
| 14 SCUBE3  | 21 PSG6   |
| 15 COL11A1 | 22 PSG9   |
| 16 HAPLN1  | 23 PTGS1  |
| 17 GALNT5  | 24 RECK   |
| 18 GPR51   | 25 RGS4   |
| 19 KCNK2   | 26 SYNPO2 |
