# Supplementary material
Source: PubMed Central journal article supplement (PMC1480455)
Supplement: pnas_0510909103_4.pdf [file pnas_0510909103_4.pdf]

| a                               | L2L database list       | P value |
|---------------------------------|-------------------------|---------|
| Chromatin-disrupting conditions |                         |         |
|                                 | hdaci_colon_but24hrs_up | 8.0e-07 |
|                                 | dac_fibro_up            | 1.0e-06 |
|                                 | idx_tsa_up_cluster1     | 6.6e-06 |
|                                 | hdaci_colon_but12hrs_up | 9.5e-06 |
|                                 | hdaci_colon_tsa2hrs_up  | 1.2e-05 |
|                                 | tsa_hepatoma_up         | 8.1e-05 |
|                                 | hdaci_colon_but30min_dn | 3.2e-04 |
|                                 | hdaci_colon_but48hrs_up | 7.3e-04 |
|                                 | hdaci_colon_tsabut_up   | 1.2e-03 |
|                                 | idx_tsa_dn_cluster3     | 1.5e-03 |
|                                 | hdaci_colon_but_up      | 2.2e-03 |
|                                 | hdaci_colon_tsa_up      | 2.7e-03 |
|                                 | hdaci_three_up          | 4.1e-03 |
|                                 | tsadac_panc50_up        | 8.7e-03 |
|                                 | idx_tsa_dn_cluster1     | 9.1e-03 |
|                                 | hdaci_colon_but48hrs_dn | 1.0e-02 |
|                                 | idx_tsa_dn_cluster2     | 1.4e-02 |
|                                 | hdaci_colon_but16hrs_up | 1.4e-02 |
|                                 | tsadac_hypometh_ovca_up | 1.8e-02 |
|                                 | idx_tsa_up_cluster3     | 1.0e-13 |
|                                 | idx_tsa_up_cluster1     | 7.1e-04 |
|                                 | ni2_lung_dn             | 8.6e-04 |
|                                 | dac_fibro_dn            | 1.0e-03 |
|                                 | hdaci_colon_but_dn      | 1.1e-03 |
|                                 | hdaci_colon_but48hrs_up | 1.3e-03 |
|                                 | hdaci_colon_but_up      | 2.3e-03 |
|                                 | hdaci_colon_but24hrs_up | 3.0e-03 |
|                                 | idx_tsa_up_cluster5     | 3.4e-03 |
|                                 | hdaci_colon_but30min_dn | 5.4e-03 |
|                                 | hdaci_colon_tsa2hrs_up  | 7.6e-03 |
|                                 | dac_cgi_fibro_dn        | 1.0e-02 |
|                                 | tsa_panc50_up           | 1.0e-02 |
|                                 | tsa_cd4_up              | 1.2e-02 |
|                                 | hdaci_colon_tsabut_up   | 1.4e-02 |
|                                 | hdaci_colon_tsa24hrs_up | 1.4e-02 |
|                                 | hdaci_colon_but48hrs_dn | 1.6e-02 |
|                                 | hdaci_colon_but24hrs_dn | 1.8e-02 |

| d                   | L2L database list               | P value |
|---------------------|---------------------------------|---------|
| Interferon response |                                 |         |
|                     | ifna_hcmv_6hrs_up               | 2.6e-07 |
|                     | ifn_gamma_up                    | 4.0e-07 |
|                     | ifn_beta_up                     | 8.8e-07 |
|                     | ifnalpna_nl_hcc_up              | 3.0e-06 |
|                     | ifnalpna_nl_up                  | 6.0e-06 |
|                     | ifn_any_up                      | 7.0e-06 |
|                     | ifnalpna_hcc_up                 | 5.2e-05 |
|                     | ifna_uv-cmv_common_hcmv_6hrs_up | 6.7e-04 |
|                     | ifn_alpha_up                    | 1.1e-03 |
|                     | ifn_all_up                      | 3.6e-03 |
|                     | nf90_up                         | 1.7e-02 |
|                     | nf90_dn                         | 3.4e-03 |
|                     | ifn_alpha_dn                    | 1.2e-02 |
|                     | ifn_beta_glioma_up              | 1.7e-02 |

| b                 | L2L database list              | P value |
|-------------------|--------------------------------|---------|
| Oxidation agents  |                                |         |
|                   | h2o2_csbrescued_up             | 8.5e-08 |
|                   | as3_hek293_dn                  | 1.5e-05 |
|                   | bleo_human_lymph_high_24hrs_up | 2.5e-04 |
|                   | bleo_human_lymph_high_24hrs_dn | 5.5e-04 |
|                   | bleo_human_lymph_high_4hrs_up  | 1.3e-02 |
|                   | bleo_human_lymph_high_4hrs_dn  | 1.2e-03 |
|                   | bleo_mouse_lymph_low_24hrs_dn  | 4.2e-03 |
| Alkylating agents |                                |         |
|                   | mms_human_lymph_high_24hrs_up  | 1.1e-04 |
|                   | bcnu_glioma_mgmt_24hrs_dn      | 8.8e-04 |
|                   | mms_mouse_lymph_high_4hrs_up   | 4.7e-10 |
|                   | cis_resist_lung_up             | 1.4e-02 |
| Ultraviolet light |                                |         |
|                   | uvc_high_all_dn                | 1.6e-04 |
|                   | uvc_low_all_up                 | 3.2e-04 |
|                   | 4nqo_unique_fibro_up           | 6.2e-04 |
|                   | uvc_low_all_dn                 | 1.8e-03 |
|                   | uvb_nhek1_c1                   | 2.7e-03 |
|                   | uvb_nhek1_up                   | 3.2e-03 |
|                   | uvc_low_c3_dn                  | 3.6e-03 |
|                   | uvc_high_all_up                | 1.3e-02 |
|                   | uvc_low_a2_up                  | 1.3e-02 |
|                   | uvb_scc_up                     | 2.6e-08 |
|                   | uvb_nhek1_up                   | 2.0e-05 |
|                   | uvb_nhek1_c2                   | 2.5e-04 |
|                   | uvb_nhek2_up                   | 6.5e-04 |
|                   | uvc_high_d4_dn                 | 1.5e-03 |
|                   | uvc_high_all_dn                | 1.7e-03 |
|                   | uvb_nhek1_c6                   | 2.2e-03 |
|                   | uvc_low_all_up                 | 3.0e-03 |
|                   | uvb_nhek1_dn                   | 3.3e-03 |
|                   | uvc_high_all_up                | 8.7e-03 |
|                   | uvc_high_b2_up                 | 1.0e-02 |

| e             | L2L database list       | P value |
|---------------|-------------------------|---------|
| Normal ageing |                         |         |
|               | ageing_brain_up         | 3.2e-06 |
|               | oldage_up               | 1.5e-04 |
|               | alzheimers_disease_dn   | 3.2e-04 |
|               | middleage_up            | 6.7e-04 |
|               | ageing_brain_dn         | 4.9e-03 |
|               | alzheimers_incipient_up | 1.0e-02 |
|               | alzheimers_incipient_dn | 1.3e-02 |
|               | alzheimers_disease_up   | 4.4e-08 |
|               | alzheimers_disease_dn   | 2.8e-07 |
|               | alzheimers_incipient_up | 1.9e-06 |
|               | alzheimers_incipient_dn | 4.5e-05 |
|               | oldage_dn               | 2.2e-04 |
|               | aged_mouse_cortex_up    | 2.4e-03 |
|               | middleage_up            | 1.0e-02 |

| c                         | L2L database list               | P value |
|---------------------------|---------------------------------|---------|
| Inflammatory response     |                                 |         |
|                           | emt_up                          | 2.7e-07 |
|                           | tgfbeta_all_up                  | 1.2e-05 |
|                           | tgfbeta_c3_up                   | 1.8e-05 |
|                           | tgfbeta_early_up                | 7.6e-05 |
|                           | jnk_up                          | 1.6e-03 |
|                           | tnfalpha_4hrs_up                | 4.7e-03 |
|                           | p53genes_all                    | 9.7e-03 |
|                           | emt_dn                          | 9.8e-03 |
|                           | tgfbeta_c1_up                   | 1.3e-02 |
|                           | p21_middle_dn                   | 1.2e-06 |
|                           | p21_all_dn                      | 1.0e-04 |
|                           | p21_p53_all_dn                  | 5.6e-04 |
|                           | p21_early_up                    | 2.2e-03 |
|                           | p21_all_up                      | 5.0e-03 |
| Anti-inflammatory effects |                                 |         |
|                           | hdaci_colon_cur_up              | 1.3e-04 |
|                           | hdaci_colon_sul_dn              | 4.0e-04 |
|                           | hdaci_colon_sul24hrs_dn         | 6.5e-04 |
|                           | hdaci_colon_cur12hrs_up         | 1.6e-03 |
|                           | hdaci_colon_sul30min_dn         | 6.0e-03 |
|                           | hdaci_colon_sul48hrs_dn         | 8.7e-03 |
|                           | hdaci_colon_sul12hrs_up         | 9.6e-03 |
|                           | hdaci_colon_cursul_up           | 1.8e-02 |
|                           | hdaci_colon_sul16hrs_up         | 1.8e-02 |
|                           | hdaci_colon_sul2hrs_up          | 3.4e-10 |
|                           | hdaci_colon_cursul_up           | 2.8e-05 |
|                           | hdaci_colon_cur_up              | 1.9e-04 |
|                           | hdaci_colon_cur2hrs_up          | 6.7e-04 |
|                           | hdaci_colon_sul12hrs_up         | 8.1e-04 |
|                           | hdaci_colon_sul_up              | 9.7e-04 |
|                           | hdaci_colon_cur12hrs_up         | 1.0e-03 |
|                           | hdaci_colon_sul16hrs_up         | 1.9e-03 |
|                           | hdaci_colon_sul48hrs_up         | 2.6e-03 |
|                           | hdaci_colon_cur48hrs_up         | 1.6e-02 |
| Hypoxic response          |                                 |         |
|                           | hypoxia_fibro_young_up          | 1.2e-06 |
|                           | hypoxia_normal_up               | 3.5e-04 |
|                           | hif1_targets                    | 4.7e-04 |
|                           | hypoxia_review                  | 1.6e-03 |
|                           | hypoxia_fibro_up                | 2.1e-03 |
|                           | hypoxia_rcc_up                  | 2.2e-03 |
|                           | hypoxia_reg_up                  | 1.0e-02 |
| Growth and proliferation  |                                 |         |
|                           | dox_resist_gastric_up           | 4.2e-14 |
|                           | brca_er_neg                     | 1.3e-13 |
|                           | brca_prognosis_neg              | 2.2e-08 |
|                           | cancer_undifferentiated_meta_up | 4.0e-08 |
|                           | egf_hdmec_up                    | 1.1e-04 |
|                           | 5fu_gastric_resist_up           | 5.5e-04 |
|                           | vegf_huvec_2hrs_up              | 4.2e-04 |
|                           | cancer_neoplastic_meta_up       | 1.0e-03 |
|                           | vegf_hmmec_6hrs_up              | 1.7e-05 |
|                           | vegf_hmmec_all_up               | 1.3e-03 |
