# Supplementary material
Source: PubMed Central journal article supplement (PMC1480455)
Supplement: pnas_0510909103_5.pdf [file pnas_0510909103_5.pdf]

**Table 2. Genes robustly down-regulated by rescue with wild-type CSB (asterisk, confirmed by RT-PCR)**

| Symbol                             | Description                                                                                                  | Probe set ID | Mean SLR | SLR SD |
|------------------------------------|--------------------------------------------------------------------------------------------------------------|--------------|----------|--------|
| <b>Extracellular matrix</b>        |                                                                                                              |              |          |        |
| COL11A1*                           | Collagen, type XI, $\alpha$ 1                                                                                | 37892_at     | -4.7     | 2.4    |
|                                    |                                                                                                              | 229271_x_at  | -3.6     | 1.8    |
|                                    |                                                                                                              | 204320_at    | -3.1     | 1.3    |
| HAPLN1*                            | Hyaluronan and proteoglycan link protein 1                                                                   | 205524_s_at  | -3.3     | 1.4    |
|                                    |                                                                                                              | 205523_at    | -2.7     | 1.6    |
| KRTHA4                             | Keratin, hair, acidic, 4                                                                                     | 206969_at    | -2.7     | 1.8    |
| ADAMTS1                            | A disintegrin-like and metalloprotease (reprolysin type) with thrombospondin type 1 motif, 1                 | 222486_s_at  | -2.4     | 0.6    |
| SERPINE1                           | Serine (or cysteine) proteinase inhibitor, clade E (nexin, plasminogen activator inhibitor type 1), member 1 | 202627_s_at  | -2.2     | 0.7    |
|                                    |                                                                                                              | 202628_s_at  | -2.0     | 0.7    |
| GALNT5*                            | UDP-N-acetyl- $\alpha$ -D-galactosamine:polypeptide <i>N</i> -acetylgalactosaminyltransferase 5 (GalNAc-T5)  | 229555_at    | -2.2     | 0.5    |
| RECK*                              | Reversion-inducing-cysteine-rich protein with kazal motifs                                                   | 205407_at    | -2.2     | 1.2    |
| <b>Pregnancy/lactation</b>         |                                                                                                              |              |          |        |
| TncRNA                             | Trophoblast-derived noncoding RNA                                                                            | 214657_s_at  | -2.7     | 1.4    |
| PSG5                               | Pregnancy-specific $\beta$ -1-glycoprotein 5                                                                 | 204830_x_at  | -2.6     | 0.6    |
| PSG9*                              | Pregnancy-specific $\beta$ -1-glycoprotein 9                                                                 | 209594_x_at  | -2.2     | 0.4    |
| PSG6*                              | Pregnancy-specific $\beta$ -1-glycoprotein 6                                                                 | 208106_x_at  | -2.0     | 0.2    |
| LNX                                | Ligand of numb-protein X                                                                                     | 223611_s_at  | -2.0     | 0.4    |
| <b>Growth factors and mitogens</b> |                                                                                                              |              |          |        |
| RGS4*                              | Regulator of G-protein signalling 4                                                                          | 204338_s_at  | -4.3     | 2.5    |
|                                    |                                                                                                              | 204339_s_at  | -2.5     | 1.0    |
|                                    |                                                                                                              | 204337_at    | -2.2     | 1.0    |
| SCUBE3*                            | Signal peptide, CUB domain, EGF-like 3                                                                       | 230290_at    | -3.3     | 1.1    |
|                                    | Signal peptide, CUB domain, EGF-like 3                                                                       | 228407_at    | -2.0     | 0.8    |
| FGF5                               | Fibroblast growth factor 5                                                                                   | 210310_s_at  | -2.4     | 0.9    |
|                                    | Fibroblast growth factor 5                                                                                   | 208378_x_at  | -2.0     | 0.5    |
| SYNPO2*                            | Synaptopodin 2                                                                                               | 225895_at    | -2.3     | 0.7    |
| RAB3B                              | RAB3B, member RAS oncogene family                                                                            | 205924_at    | -2.0     | 0.9    |
| URB                                | Steroid-sensitive gene 1                                                                                     | 225241_at    | -2.0     | 1.0    |

| Symbol                     | Description                                                                                             | Probe set ID | Mean SLR | SLR SD |
|----------------------------|---------------------------------------------------------------------------------------------------------|--------------|----------|--------|
| <b>Cytoskeletal/muscle</b> |                                                                                                         |              |          |        |
| MFAP5                      | Microfibrillar-associated protein 5                                                                     | 213764_s_at  | -3.6     | 1.7    |
|                            |                                                                                                         | 213765_at    | -3.6     | 1.2    |
|                            |                                                                                                         | 209758_s_at  | -3.5     | 1.6    |
| SGCD                       | Sarcoglycan, $\delta$ (35-kDa dystrophin-associated glycoprotein)                                       | 210329_s_at  | -2.5     | 2.0    |
| ITGBL1                     | Integrin, $\beta$ -like 1 (with EGF-like repeat domains)                                                | 205422_s_at  | -2.1     | 0.5    |
| SEPT11                     | Septin 11                                                                                               | 230071_at    | -2.1     | 0.8    |
| <b>Neuronal</b>            |                                                                                                         |              |          |        |
| TAFA5                      | TAFA protein 5                                                                                          | 237094_at    | -4.4     | 1.2    |
|                            |                                                                                                         | 229459_at    | -4.0     | 0.6    |
|                            |                                                                                                         | 229655_at    | -3.2     | 1.1    |
| GPR51*                     | G protein-coupled receptor 51                                                                           | 209990_s_at  | -3.0     | 1.1    |
|                            |                                                                                                         | 211679_x_at  | -2.7     | 1.5    |
| KCNK2                      | Potassium channel, subfamily K, member 2                                                                | 210261_at    | -2.4     | 0.8    |
| SLC1A1                     | Solute carrier family 1 (neuronal/epithelial high-affinity glutamate transporter, system Xag), member 1 | 213664_at    | -2.1     | 0.6    |
| NGFB                       | Nerve growth factor, $\beta$ polypeptide                                                                | 206814_at    | -2.1     | 0.8    |
| CNTN3                      | Contactin 3 (plasmacytoma associated)                                                                   | 229831_at    | -2.0     | 0.9    |
| <b>Other/unknown</b>       |                                                                                                         |              |          |        |
| ---                        | ---                                                                                                     | 231307_at    | -5.2     | 0.4    |
| LRCH2                      | Leucine-rich repeats and calponin homology (CH) domain containing 2                                     | 227688_at    | -4.3     | 1.6    |
| CDKN1A*                    | Cyclin-dependent kinase inhibitor 1A (p21, Cip1)                                                        | 202284_s_at  | -3.3     | 0.7    |
| LBH*                       | Likely ortholog of mouse limb-bud and heart gene                                                        | 221011_s_at  | -2.8     | 1.3    |
| LOC132671                  | LOC132671                                                                                               | 229331_at    | -2.8     | 0.8    |
| ---                        | ---                                                                                                     | 236129_at    | -2.8     | 1.3    |
| PODXL                      | Podocalyxin-like                                                                                        | 201578_at    | -2.6     | 1.0    |
| KIAA1199                   | KIAA1199                                                                                                | 212942_s_at  | -2.4     | 1.0    |
| ---                        | ---                                                                                                     | 209738_x_at  | -2.4     | 0.5    |
| AEBP1                      | AE-binding protein 1                                                                                    | 201792_at    | -2.3     | 0.9    |
| DKFZP586H2123              | Regeneration-associated muscle protease                                                                 | 213661_at    | -2.3     | 0.6    |
| ---                        | CDNA: FLJ23131 fis, clone LNG08502                                                                      | 231993_at    | -2.3     | 0.5    |
| PTGS1*                     | Prostaglandin-endoperoxide synthase 1 (prostaglandin G/H synthase and cyclooxygenase)                   | 205128_x_at  | -2.3     | 0.8    |

| <b>Symbol</b> | <b>Description</b>                                                                       | <b>Probe set ID</b> | <b>Mean SLR</b> | <b>SLR SD</b> |
|---------------|------------------------------------------------------------------------------------------|---------------------|-----------------|---------------|
|               | Prostaglandin-endoperoxide synthase 1<br>(prostaglandin G/H synthase and cyclooxygenase) | 215813_s_at         | -2.3            | 0.7           |
| ---           | ---                                                                                      | 214927_at           | -2.1            | 0.5           |
| ---           | <i>Homo sapiens</i> , clone IMAGE:5261213, mRNA                                          | 225725_at           | -2.0            | 0.3           |

SLR, signal log ratio.
