# Supplementary material
Source: PubMed Central journal article supplement (PMC1480455)
Supplement: pnas_0510909103_6.pdf [file pnas_0510909103_6.pdf]

**Table 3. Genes robustly up-regulated by rescue with wild-type CSB (asterisk, confirmed by RT-PCR)**

| Symbol                   | Description                                                                     | Probe set ID | Mean SLR | SLR SD |
|--------------------------|---------------------------------------------------------------------------------|--------------|----------|--------|
| <b>Immune response</b>   |                                                                                 |              |          |        |
| CRIP1*                   | Cysteine-rich protein 1 (intestinal)                                            | 205081_at    | 3.9      | 1.6    |
| IL8*                     | Interleukin 8                                                                   | 202859_x_at  | 3.5      | 1.3    |
|                          |                                                                                 | 211506_s_at  | 2.0      | 0.3    |
| CD24*                    | CD24 antigen (small cell lung carcinoma cluster 4 antigen)                      | 208650_s_at  | 2.9      | 0.9    |
| CXCL2                    | Chemokine (C-X-C motif) ligand 2                                                | 209774_x_at  | 2.6      | 1.4    |
| LITAF                    | Lipopolysaccharide-induced TNF factor                                           | 200704_at    | 2.3      | 0.4    |
| IFIT2*                   | Interferon-induced protein with tetratricopeptide repeats 2                     | 226757_at    | 2.2      | 0.7    |
| PMAIP1                   | Phorbol-12-myristate-13-acetate-induced protein 1                               | 204286_s_at  | 2.2      | 0.9    |
|                          |                                                                                 | 204285_s_at  | 1.7      | 0.8    |
| RGC32                    | Response gene to complement 32                                                  | 218723_s_at  | 2.0      | 1.1    |
| TNFAIP6                  | Tumor necrosis factor, $\alpha$ -induced protein 6                              | 206026_s_at  | 2.0      | 0.6    |
|                          |                                                                                 | 206025_s_at  | 1.6      | 0.7    |
| <b>Neuronal</b>          |                                                                                 |              |          |        |
| PAK3                     | P21 (CDKN1A)-activated kinase 3                                                 | 236277_at    | 3.5      | 0.8    |
| CART1*                   | Cartilage paired-class homeoprotein 1                                           | 206837_at    | 3.5      | 1.4    |
| MYLIP                    | Myosin regulatory light chain interacting protein                               | 228098_s_at  | 3.0      | 0.9    |
| SLC38A1                  | Solute carrier family 38, member 1                                              | 218237_s_at  | 1.6      | 0.6    |
| <b>Drug resistance</b>   |                                                                                 |              |          |        |
| ABCB1*                   | ATP-binding cassette, subfamily B (MDR/TAP), member 1                           | 209994_s_at  | 5.6      | 1.1    |
|                          |                                                                                 | 209993_at    | 4.4      | 1.1    |
|                          |                                                                                 | 243951_at    | 3.0      | 0.5    |
| SRI*                     | Sorcin                                                                          | 208920_at    | 3.3      | 1.3    |
|                          | Sorcin                                                                          | 208921_s_at  | 2.8      | 0.2    |
| <b>Redox state</b>       |                                                                                 |              |          |        |
| KYNU*                    | Kynureninase (L-kynurenine hydrolase)                                           | 217388_s_at  | 6.0      | 2.2    |
|                          |                                                                                 | 210663_s_at  | 4.5      | 1.4    |
| SLC7A11*                 | Solute carrier family 7, (cationic amino acid transporter, y+ system) member 11 | 209921_at    | 3.0      | 1.3    |
|                          |                                                                                 | 217678_at    | 2.7      | 1.2    |
| <b>Cell-cycle/cancer</b> |                                                                                 |              |          |        |

| <b>Symbol</b>       | <b>Description</b>                                   | <b>Probe set ID</b> | <b>Mean SLR</b> | <b>SLR SD</b> |
|---------------------|------------------------------------------------------|---------------------|-----------------|---------------|
| ASK                 | Activator of S phase kinase                          | 204244_s_at         | 4.1             | 0.6           |
| CLDN23              | Claudin 23                                           | 228707_at           | 3.6             | 1.1           |
| STEAP               | Six transmembrane epithelial antigen of the prostate | 205542_at           | 2.6             | 0.7           |
| HERC5               | Hect domain and RLD 5                                | 219863_at           | 1.7             | 0.4           |
| <b>Other/Unkown</b> |                                                      |                     |                 |               |
| MGC11324            | Hypothetical protein MGC11324                        | 224480_s_at         | 4.0             | 1.6           |
| KIAA1211            | KIAA1211 protein                                     | 227230_s_at         | 3.4             | 0.9           |
| MCFP                | Mitochondrial carrier family protein                 | 227012_at           | 3.3             | 0.7           |
| CSTA*               | Cystatin A (stefin A)                                | 204971_at           | 2.4             | 1.2           |
| PCSK5               | Proprotein convertase subtilisin/kexin type 5        | 213652_at           | 2.3             | 1.3           |
| FABP5               | Fatty acid-binding protein 5 (psoriasis-associated)  | 202345_s_at         | 1.9             | 0.5           |

SLR, signal log ratio.
