# Supplementary material
Source: PubMed Central journal article supplement (PMC1480455)
Supplement: pnas_0510909103_7.pdf [file pnas_0510909103_7.pdf]

**Table 6. Quantitative evaluation of L2L results by theme**

| Topic in L2L database | Topic description                                | Number of lists in cluster | Number of lists with $P < 0.02$ overlaps with CSB-Down data | Frequency of an equal or greater number of $P < 0.02$ overlaps in simulation data | Number of $P < 0.02$ overlaps with CSB-Up data | Frequency of an equal or greater number of $P < 0.02$ overlaps in simulation data |
|-----------------------|--------------------------------------------------|----------------------------|-------------------------------------------------------------|-----------------------------------------------------------------------------------|------------------------------------------------|-----------------------------------------------------------------------------------|
| aged_dn               | Down-regulation during ageing                    | 13                         | 3                                                           | 0.022                                                                             | 3                                              | 0.015                                                                             |
| aged_up               | Up-regulation during ageing                      | 13                         | 4                                                           | 0.0051                                                                            | 4                                              | 0.0056                                                                            |
| antiinflam_dn         | Down-regulated by antiinflammatory drugs         | 13                         | 4                                                           | 0.028                                                                             | 0                                              | 1                                                                                 |
| antiinflam_up         | Up-regulated by antiinflammatory drugs           | 13                         | 5                                                           | 0.027                                                                             | 10                                             | 0.0016                                                                            |
| brca_dn               | Down-regulation by BRCA1/2 function              | 4                          | 2                                                           | 0.0065                                                                            | 0                                              | 1                                                                                 |
| brca_up               | Up-regulation by BRCA1/2 function                | 7                          | 1                                                           | 0.28                                                                              | 4                                              | < 0.0001                                                                          |
| chrom-disrupt_dn      | Down-regulated by chromatin-disrupting factors   | 26                         | 3                                                           | 0.11                                                                              | 10                                             | 0.0002                                                                            |
| chrom-disrupt_up      | Up-regulated by chromatin-disrupting factors     | 42                         | 16                                                          | < 0.0001                                                                          | 8                                              | 0.0059                                                                            |
| damage-alkyl_dn       | Down-regulated by alkylating DNA damaging agents | 10                         | 1                                                           | 0.22                                                                              | 1                                              | 0.27                                                                              |
| damage-alkyl_up       | Up-regulated by alkylating DNA damaging agents   | 12                         | 1                                                           | 0.29                                                                              | 1                                              | 0.29                                                                              |
| damage-et743_dn       | Down-regulated by Ecteinascidin-743              | 8                          | 0                                                           | 1                                                                                 | 1                                              | 0.16                                                                              |
| damage-et743_up       | Up-regulated by Ecteinascidin-743                | 7                          | 5                                                           | 0.0003                                                                            | 0                                              | 1                                                                                 |
| damage-ox_dn          | Down-regulated by oxidative DNA damaging agents  | 14                         | 2                                                           | 0.11                                                                              | 2                                              | 0.097                                                                             |
| damage-ox_up          | Up-regulated by oxidative DNA damaging agents    | 10                         | 3                                                           | 0.026                                                                             | 0                                              | 1                                                                                 |

| <b>Topic in L2L database</b> | <b>Topic description</b>                 | <b>Number of lists in cluster</b> | <b>Number of lists with <math>P &lt; 0.02</math> overlaps with CSB-Down data</b> | <b>Frequency of an equal or greater number of <math>P &lt; 0.02</math> overlaps in simulation data</b> | <b>Number of <math>P &lt; 0.02</math> overlaps with CSB-Up data</b> | <b>Frequency of an equal or greater number of <math>P &lt; 0.02</math> overlaps in simulation data</b> |
|------------------------------|------------------------------------------|-----------------------------------|----------------------------------------------------------------------------------|--------------------------------------------------------------------------------------------------------|---------------------------------------------------------------------|--------------------------------------------------------------------------------------------------------|
| damage-uv_dn                 | Down-regulated by ultraviolet DNA damage | 24                                | 3                                                                                | 0.090                                                                                                  | 4                                                                   | 0.031                                                                                                  |
| damage-uv_up                 | Up-regulated by ultraviolet DNA damage   | 17                                | 6                                                                                | 0.0004                                                                                                 | 7                                                                   | 0.0001                                                                                                 |
| hypoxia_up                   | Up-regulated by hypoxia                  | 8                                 | 7                                                                                | $< 0.0001$                                                                                             | 0                                                                   | 1                                                                                                      |
| ifn_dn                       | Down-regulated by interferons            | 5                                 | 0                                                                                | 1                                                                                                      | 0                                                                   | 1                                                                                                      |
| ifn_up                       | Up-regulated by interferons              | 12                                | 3                                                                                | 0.033                                                                                                  | 11                                                                  | $< 0.0001$                                                                                             |
