# Supplementary material
Source: PubMed Central journal article supplement (PMC1480455)
Supplement: pnas_0510909103_8.pdf [file pnas_0510909103_8.pdf]

Table 7. OPOSSUM-predicted transcription-factor-binding sites (TFBS) most overabundant in genes reliably down-regulated by CSB

| <b>TF name</b> | <b>Background TFBS hits (of 8706)</b> | <b>Background TFBS rate</b> | <b>CSB-Down TFBS hits (of 194)</b> | <b>CSB-Down TFBS rate</b> | <b>Fisher <i>P</i> value</b> |
|----------------|---------------------------------------|-----------------------------|------------------------------------|---------------------------|------------------------------|
| c-REL          | 3395                                  | 0.39                        | 117                                | 0.60                      | 2.5e-9                       |
| Hunchback      | 4220                                  | 0.49                        | 129                                | 0.66                      | 4.1e-7                       |
| p65            | 1999                                  | 0.23                        | 76                                 | 0.39                      | 4.4e-7                       |
| HMG-1          | 5782                                  | 0.66                        | 160                                | 0.82                      | 5.9e-7                       |
| C/EBP          | 3510                                  | 0.40                        | 112                                | 0.58                      | 9.8e-7                       |
| NF-kappaB      | 2473                                  | 0.28                        | 86                                 | 0.44                      | 2.2e-6                       |
| DeltaEF1       | 7183                                  | 0.83                        | 182                                | 0.94                      | 3.7e-6                       |
| Dorsal2        | 1910                                  | 0.22                        | 70                                 | 0.36                      | 6.5e-6                       |
| SRY            | 5210                                  | 0.60                        | 145                                | 0.75                      | 1.2e-5                       |
