# Supplementary material
Source: PubMed Central journal article supplement (PMC1480455)

Probe Sets

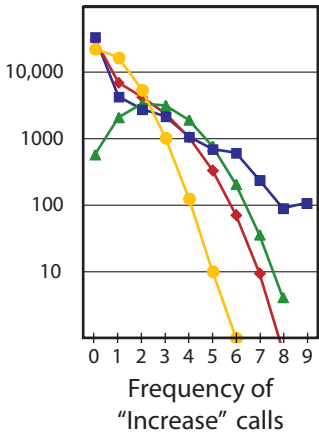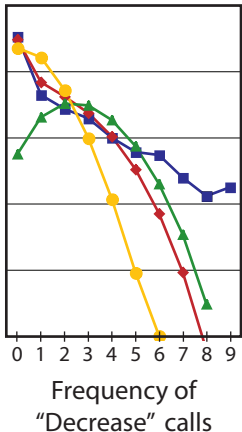

Supplement: pnas_0510909103_2.pdf [file pnas_0510909103_2.pdf]
